# Supplementary material for: The usefulness of multi-parent multi-environment QTL analysis: an illustration in different NAM populations
Source: bioRxiv or medRxiv preprint supplement (doi:10.1101/2020.02.03.931626), 2020-02-03
Supplement: Supplementary file [file media-1.pdf]

# The usefulness of multi-parent multi-environment QTL analysis: an illustration in different NAM populations - Supplementary material

Vincent Garin, Marcos Malosetti, Fred van Eeuwijk

February 3, 2020

## S1: Heritability computation

We computed the trait heritabilities on a line mean basis within the  $j^{th}$  cross using the formula 3 from Hung et al. (2012)

$$h^2 = \frac{\sigma_{g(cr_j)}^2}{\sigma_{g(cr_j)}^2 + \frac{\sigma_{g \times E(cr_j)}^2}{N_{env}} + \frac{\sigma_{e(cr_j)}^2}{N_{env} * N_{rep}}} \quad (1)$$

## EU-NAM data

The model used for the computation of the heritabilities was the following:

$$y_{ijklm} = \mu + env_k + rep_{l(k)} + block_{m(lk)} + cross_j + G_i(cross_j) + G_i(cross_j) * env_k + e_{ijklm} \quad (2)$$

In model 2, all terms were random and the variance of the error term was cross-specific.

|        | $\sigma_g^2$ | se( $\sigma_g^2$ ) | $\sigma_{ge}^2$ | se( $\sigma_{ge}^2$ ) | $h^2(\%)$ |
|--------|--------------|--------------------|-----------------|-----------------------|-----------|
| D152   | 208.36       | 65.38              | 93.36           | 12.26                 | 60.65     |
| EC49A  | 0.11         | 93.29              | 80.07           | 63.86                 | 0.04      |
| EP44   | 257.42       | 139.59             | 29.11           | 176.75                | 66.64     |
| EZ5    | 41.23        | 190.46             | 0.00            |                       | 19.14     |
| F03802 | 145.96       | 47.45              | 528.20          | 282.09                | 27.36     |
| F2     | 302.10       | 79.10              | 75.92           | 66.24                 | 71.97     |
| F283   | 361.53       | 70.04              | 0.00            |                       | 77.90     |
| F64    | 222.86       | 80.69              | 100.30          | 61.39                 | 60.92     |
| UH006  | 224.28       | 60.12              | 138.10          | 81.42                 | 57.17     |
| UH009  | 20.12        | 37.53              | 75.42           | 62.59                 | 12.70     |
| DK105  | 270.12       | 75.60              | 106.34          | 61.26                 | 59.76     |

## US-NAM data

The model used for the computation of the heritabilities was the following:

$$y_{ijklmno} = \mu + env_k + set_{l(k)} + block_{m(lk)} + row_{n(k)} + col_{o(k)} + cross_j + G_i(cross_j) + G_i * env_k + e_{ijklm} \quad (3)$$

In model 3, all terms were random and the variance of the error term was modelled by an environmental specific autoregressive correlation in the row and columns (AR1 x AR1) (Gilmour et al., 1997). For the USNAM data we were not able to fit a model with within cross genotype by environment variance term so we used an homogenous genotype by environment variance term.

|        | sigma.g | std.err | sigma.ge | std.err | heritability |
|--------|---------|---------|----------|---------|--------------|
| B97    | 1.77    | 0.32    | 0.97     | 0.10    | 75.64        |
| CML103 | 1.69    | 0.37    | 0.97     | 0.10    | 64.63        |
| CML228 | 7.09    | 1.13    | 0.97     | 0.10    | 73.13        |
| CML247 | 7.19    | 0.94    | 0.97     | 0.10    | 85.04        |
| CML277 | 10.02   | 1.44    | 0.97     | 0.10    | 79.75        |
| CML322 | 3.57    | 0.54    | 0.97     | 0.10    | 82.26        |
| CML333 | 4.18    | 0.62    | 0.97     | 0.10    | 80.23        |
| CML52  | 6.20    | 0.83    | 0.97     | 0.10    | 86.47        |
| CML69  | 2.13    | 0.47    | 0.97     | 0.10    | 61.21        |
| Hp301  | 3.24    | 0.44    | 0.97     | 0.10    | 86.98        |
| IL14H  | 4.32    | 0.54    | 0.97     | 0.10    | 89.91        |
| Ki11   | 6.50    | 1.06    | 0.97     | 0.10    | 70.35        |
| Ki3    | 3.79    | 0.64    | 0.97     | 0.10    | 86.53        |
| Ky21   | 1.64    | 0.32    | 0.97     | 0.10    | 71.62        |
| M162W  | 3.09    | 0.50    | 0.97     | 0.10    | 78.33        |
| M37W   | 3.09    | 0.53    | 0.97     | 0.10    | 73.31        |
| Mo18W  | 4.84    | 0.76    | 0.97     | 0.10    | 76.34        |
| MS71   | 2.22    | 0.32    | 0.97     | 0.10    | 82.07        |
| NC350  | 2.77    | 0.51    | 0.97     | 0.10    | 70.48        |
| NC358  | 1.67    | 0.33    | 0.97     | 0.10    | 73.09        |
| Oh43   | 1.73    | 0.33    | 0.97     | 0.10    | 72.38        |
| Oh7B   | 2.51    | 0.42    | 0.97     | 0.10    | 80.19        |
| P39    | 5.47    | 0.68    | 0.97     | 0.10    | 91.86        |
| Tx303  | 2.89    | 0.50    | 0.97     | 0.10    | 74.29        |
| Tzi8   | 4.60    | 0.68    | 0.97     | 0.10    | 85.03        |

## S2: List of detected QTLs

EU-NAM data

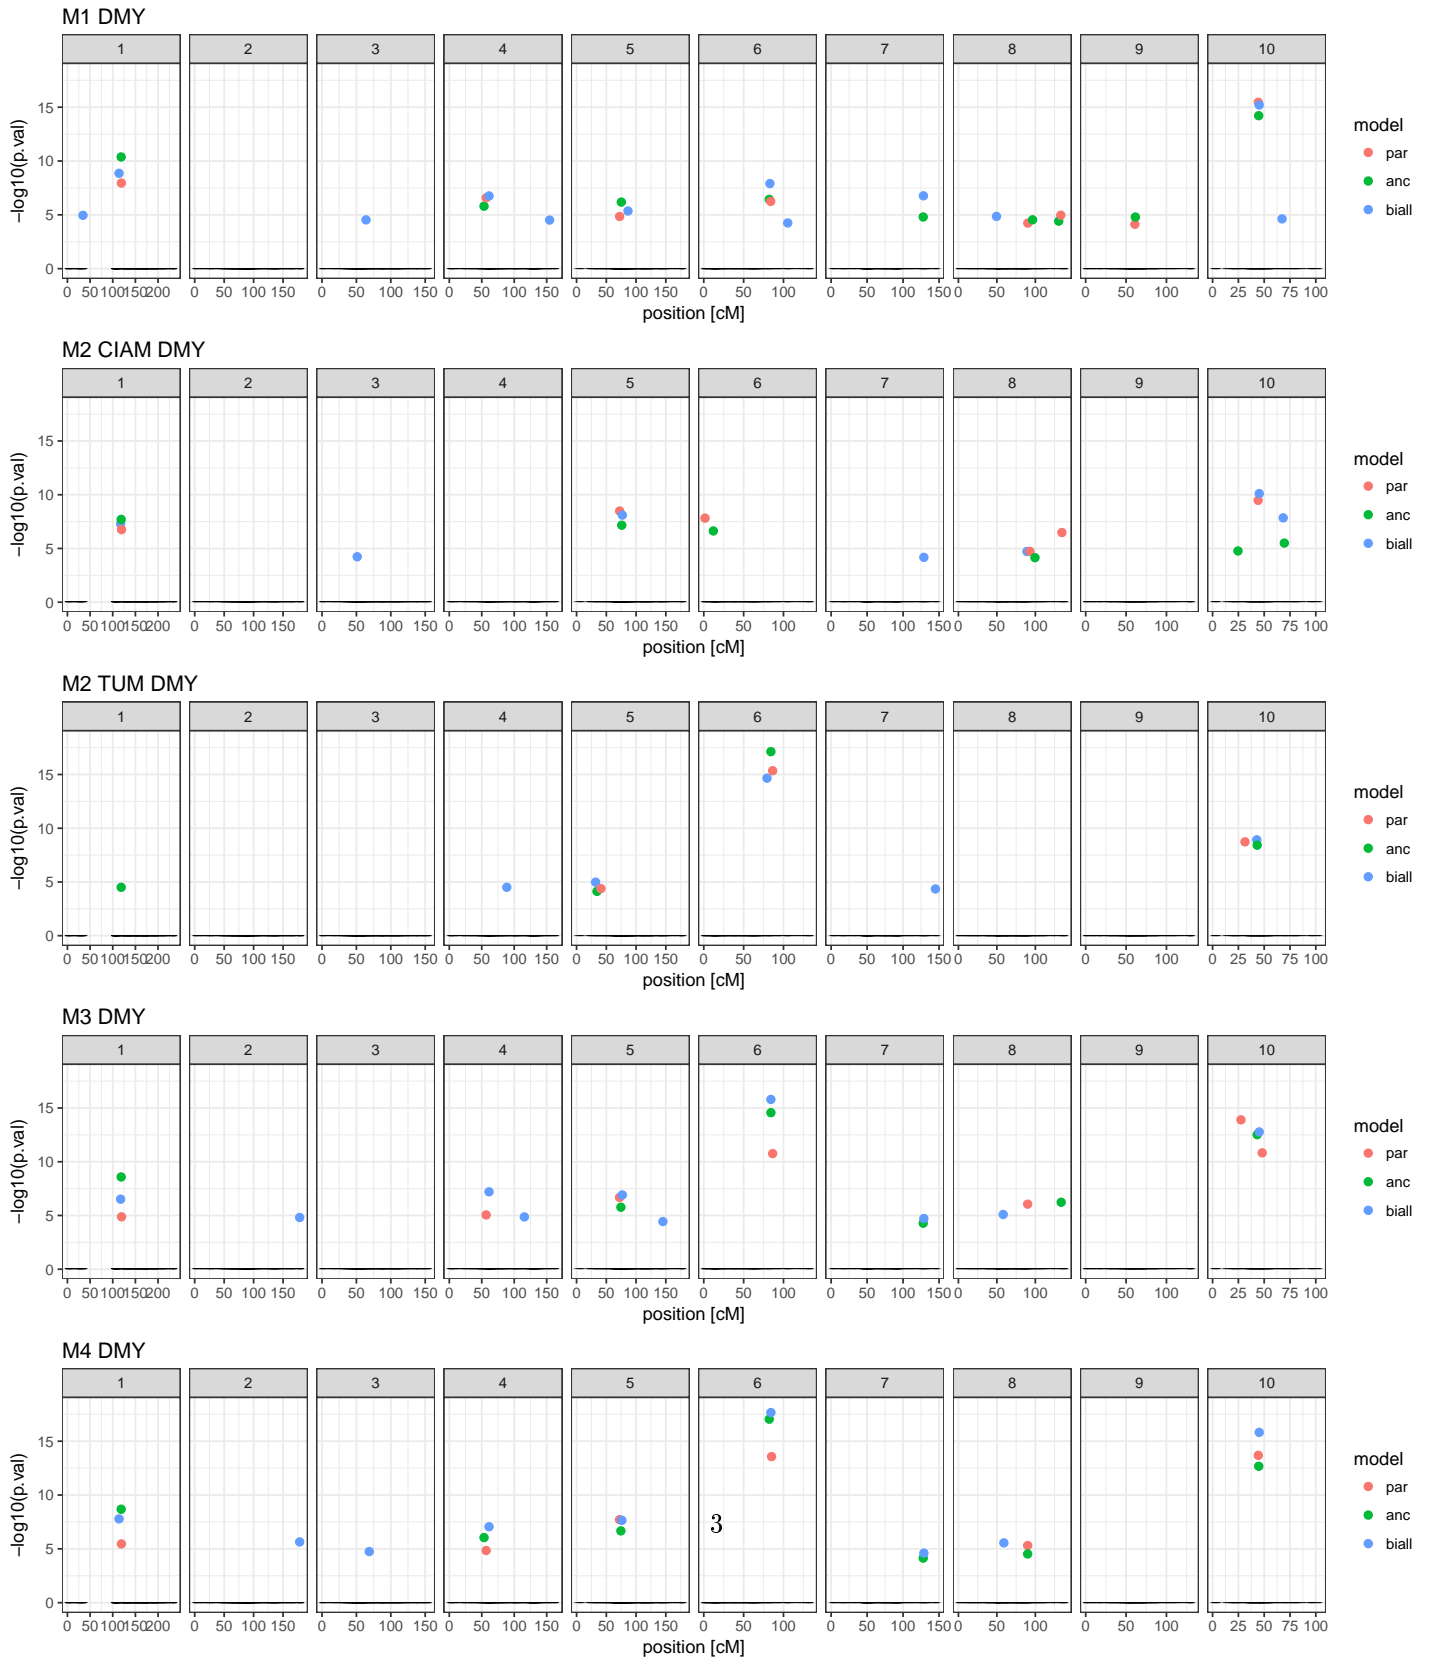

Figure 1: List of QTLs

## EU-NAM M1

|            | n  | Mk. names     | chr | pos [cM] | $-\log_{10}(\text{pval})$ |
|------------|----|---------------|-----|----------|---------------------------|
| parental   |    |               |     |          |                           |
|            | 1  | PZE.101146834 | 1   | 119.1    | 8                         |
|            | 2  | PZE.104027223 | 4   | 56.8     | 6.6                       |
|            | 3  | PZE.105054186 | 5   | 72.4     | 4.8                       |
|            | 4  | PZE.106101027 | 6   | 83.9     | 6.3                       |
|            | 5  | PZE.108099840 | 8   | 90.2     | 4.2                       |
|            | 6  | PZE.108131921 | 8   | 133.1    | 5                         |
|            | 7  | PZE.109054632 | 9   | 60.9     | 4.1                       |
|            | 8  | PZE.110048720 | 10  | 44.3     | 15.5                      |
| ancestral  |    |               |     |          |                           |
|            | 1  | PZE.101144216 | 1   | 118.6    | 10.4                      |
|            | 2  | PZE.104029507 | 4   | 53.5     | 5.8                       |
|            | 3  | PZE.105068880 | 5   | 75.2     | 6.2                       |
|            | 4  | PZE.106098066 | 6   | 82.1     | 6.4                       |
|            | 5  | PZE.107128534 | 7   | 128      | 4.8                       |
|            | 6  | PZE.108109731 | 8   | 96.4     | 4.5                       |
|            | 7  | PZE.108131479 | 8   | 130.4    | 4.4                       |
|            | 8  | PZE.109058296 | 9   | 61.5     | 4.8                       |
|            | 9  | PZE.110049068 | 10  | 44.7     | 14.2                      |
| bi-allelic |    |               |     |          |                           |
|            | 1  | PZE.101024519 | 1   | 34.3     | 5                         |
|            | 2  | PZE.101143233 | 1   | 113.9    | 8.9                       |
|            | 3  | PZE.103096063 | 3   | 64       | 4.5                       |
|            | 4  | PZE.104052802 | 4   | 61.2     | 6.8                       |
|            | 5  | PZE.104153023 | 4   | 154.5    | 4.5                       |
|            | 6  | PZE.105103875 | 5   | 86.4     | 5.4                       |
|            | 7  | PZE.106097991 | 6   | 83       | 7.9                       |
|            | 8  | PZE.106114241 | 6   | 105.3    | 4.3                       |
|            | 9  | PZE.107128336 | 7   | 128.3    | 6.8                       |
|            | 10 | PZE.108027746 | 8   | 49.5     | 4.9                       |
|            | 11 | PZE.110049474 | 10  | 45.2     | 15.2                      |
|            | 12 | PZE.110086343 | 10  | 67.3     | 4.6                       |

## EU-NAM M2 CIAM

|            | n | Mk. names     | chr | pos [cM] | $-\log_{10}(pval)$ |
|------------|---|---------------|-----|----------|--------------------|
| parental   |   |               |     |          |                    |
|            | 1 | PZE.101147104 | 1   | 119.4    | 6.8                |
|            | 2 | PZE.105054186 | 5   | 72.4     | 8.5                |
|            | 3 | PZA00606.3    | 6   | 1.6      | 7.8                |
|            | 4 | PZE.108104106 | 8   | 92.9     | 4.7                |
|            | 5 | PZE.108133621 | 8   | 134.5    | 6.5                |
|            | 6 | PZE.110049572 | 10  | 44.1     | 9.5                |
| ancestral  |   |               |     |          |                    |
|            | 1 | PZE.101144216 | 1   | 118.6    | 7.7                |
|            | 2 | PZE.105063383 | 5   | 76       | 7.2                |
|            | 3 | PZE.106009233 | 6   | 12       | 6.6                |
|            | 4 | PZE.108110343 | 8   | 99.5     | 4.1                |
|            | 5 | PZE.110009558 | 10  | 24.6     | 4.8                |
|            | 6 | PZE.110087849 | 10  | 69.5     | 5.5                |
| bi-allelic |   |               |     |          |                    |
|            | 1 | PZE.101144248 | 1   | 117.4    | 7.3                |
|            | 2 | PZE.103072486 | 3   | 51.2     | 4.2                |
|            | 3 | PZE.105074287 | 5   | 76.9     | 8.1                |
|            | 4 | PZE.107128846 | 7   | 128.9    | 4.2                |
|            | 5 | PZE.108099415 | 8   | 89.1     | 4.7                |
|            | 6 | PZE.110049474 | 10  | 45.2     | 10.1               |
|            | 7 | PZE.110088931 | 10  | 68.4     | 7.8                |

## EU-NAM M2 TUM

|            | n | Mk. names     | chr | pos [cM] | $-\log_{10}(pval)$ |
|------------|---|---------------|-----|----------|--------------------|
| parental   |   |               |     |          |                    |
|            | 1 | PZE.105019465 | 5   | 40.9     | 4.4                |
|            | 2 | PZE.106102395 | 6   | 86.4     | 15.4               |
|            | 3 | PZE.110013764 | 10  | 31.4     | 8.7                |
| ancestral  |   |               |     |          |                    |
|            | 1 | PZE.101144216 | 1   | 118.6    | 4.5                |
|            | 2 | PZE.105017551 | 5   | 34.3     | 4.1                |
|            | 3 | PZE.106101278 | 6   | 84.2     | 17.1               |
|            | 4 | PZE.110049040 | 10  | 43.2     | 8.4                |
| bi-allelic |   |               |     |          |                    |
|            | 1 | PZE.104094429 | 4   | 88.6     | 4.5                |
|            | 2 | PZE.105017975 | 5   | 32       | 5                  |
|            | 3 | PZE.106095383 | 6   | 79.3     | 14.7               |
|            | 4 | PZE.107136612 | 7   | 145      | 4.4                |
|            | 5 | PZE.110049406 | 10  | 42.8     | 8.9                |

### EU-NAM M3

|            | n  | Mk. names     | chr | pos [cM] | $-\log_{10}(\text{pval})$ |
|------------|----|---------------|-----|----------|---------------------------|
| parental   |    |               |     |          |                           |
|            | 1  | PZE.101147104 | 1   | 119.4    | 4.9                       |
|            | 2  | PZE.104027223 | 4   | 56.8     | 5.1                       |
|            | 3  | PZE.105062183 | 5   | 72.2     | 6.7                       |
|            | 4  | PZE.106102395 | 6   | 86.4     | 10.8                      |
|            | 5  | PZE.108099425 | 8   | 90       | 6.1                       |
|            | 6  | PZE.110010098 | 10  | 27.5     | 13.9                      |
|            | 7  | PZE.110049922 | 10  | 48.1     | 10.8                      |
| ancestral  |    |               |     |          |                           |
|            | 1  | PZE.101144216 | 1   | 118.6    | 8.6                       |
|            | 2  | PZE.105065789 | 5   | 74.5     | 5.8                       |
|            | 3  | PZE.106101278 | 6   | 84.2     | 14.6                      |
|            | 4  | PZE.107128534 | 7   | 128      | 4.3                       |
|            | 5  | PZE.108133100 | 8   | 133.6    | 6.2                       |
|            | 6  | PZE.110049040 | 10  | 43.2     | 12.5                      |
| bi-allelic |    |               |     |          |                           |
|            | 1  | PZE.101144248 | 1   | 117.4    | 6.5                       |
|            | 2  | PZE.102192367 | 2   | 178.2    | 4.8                       |
|            | 3  | PZE.104052802 | 4   | 61.2     | 7.2                       |
|            | 4  | PZE.104110016 | 4   | 115.6    | 4.9                       |
|            | 5  | PZE.105074287 | 5   | 76.9     | 6.9                       |
|            | 6  | PZE.105160757 | 5   | 145.1    | 4.4                       |
|            | 7  | PZE.106101278 | 6   | 84.2     | 15.8                      |
|            | 8  | PZE.107128846 | 7   | 128.9    | 4.7                       |
|            | 9  | PZE.108057679 | 8   | 58.2     | 5.1                       |
|            | 10 | PZE.110049474 | 10  | 45.2     | 12.8                      |

## EU-NAM M4

|            | n | Mk. names     | chr | pos [cM] | -log10(pval) |
|------------|---|---------------|-----|----------|--------------|
| parental   |   |               |     |          |              |
|            | 1 | PZE.101146834 | 1   | 119.1    | 5.5          |
|            | 2 | PZE.104027223 | 4   | 56.8     | 4.9          |
|            | 3 | PZE.105062183 | 5   | 72.2     | 7.7          |
|            | 4 | PZE.106099144 | 6   | 85       | 13.6         |
|            | 5 | PZE.108099425 | 8   | 90       | 5.3          |
|            | 6 | PZE.110048720 | 10  | 44.3     | 13.7         |
| ancestral  |   |               |     |          |              |
|            | 1 | PZE.101144216 | 1   | 118.6    | 8.7          |
|            | 2 | PZE.104029507 | 4   | 53.5     | 6.1          |
|            | 3 | PZE.105065789 | 5   | 74.5     | 6.7          |
|            | 4 | PZE.106098066 | 6   | 82.1     | 17           |
|            | 5 | PZE.107128534 | 7   | 128      | 4.1          |
|            | 6 | PZE.108099425 | 8   | 90       | 4.5          |
|            | 7 | PZE.110049068 | 10  | 44.7     | 12.7         |
| bi-allelic |   |               |     |          |              |
|            | 1 | PZE.101143233 | 1   | 113.9    | 7.8          |
|            | 2 | PZE.102192367 | 2   | 178.2    | 5.6          |
|            | 3 | PZE.103106593 | 3   | 68.7     | 4.8          |
|            | 4 | PZE.104052802 | 4   | 61.2     | 7.1          |
|            | 5 | PZE.105063758 | 5   | 76.1     | 7.7          |
|            | 6 | PZE.106101278 | 6   | 84.2     | 17.7         |
|            | 7 | PZE.107128846 | 7   | 128.9    | 4.6          |
|            | 8 | PZE.108058577 | 8   | 59.1     | 5.6          |
|            | 9 | PZE.110049474 | 10  | 45.2     | 15.8         |



## US-NAM data

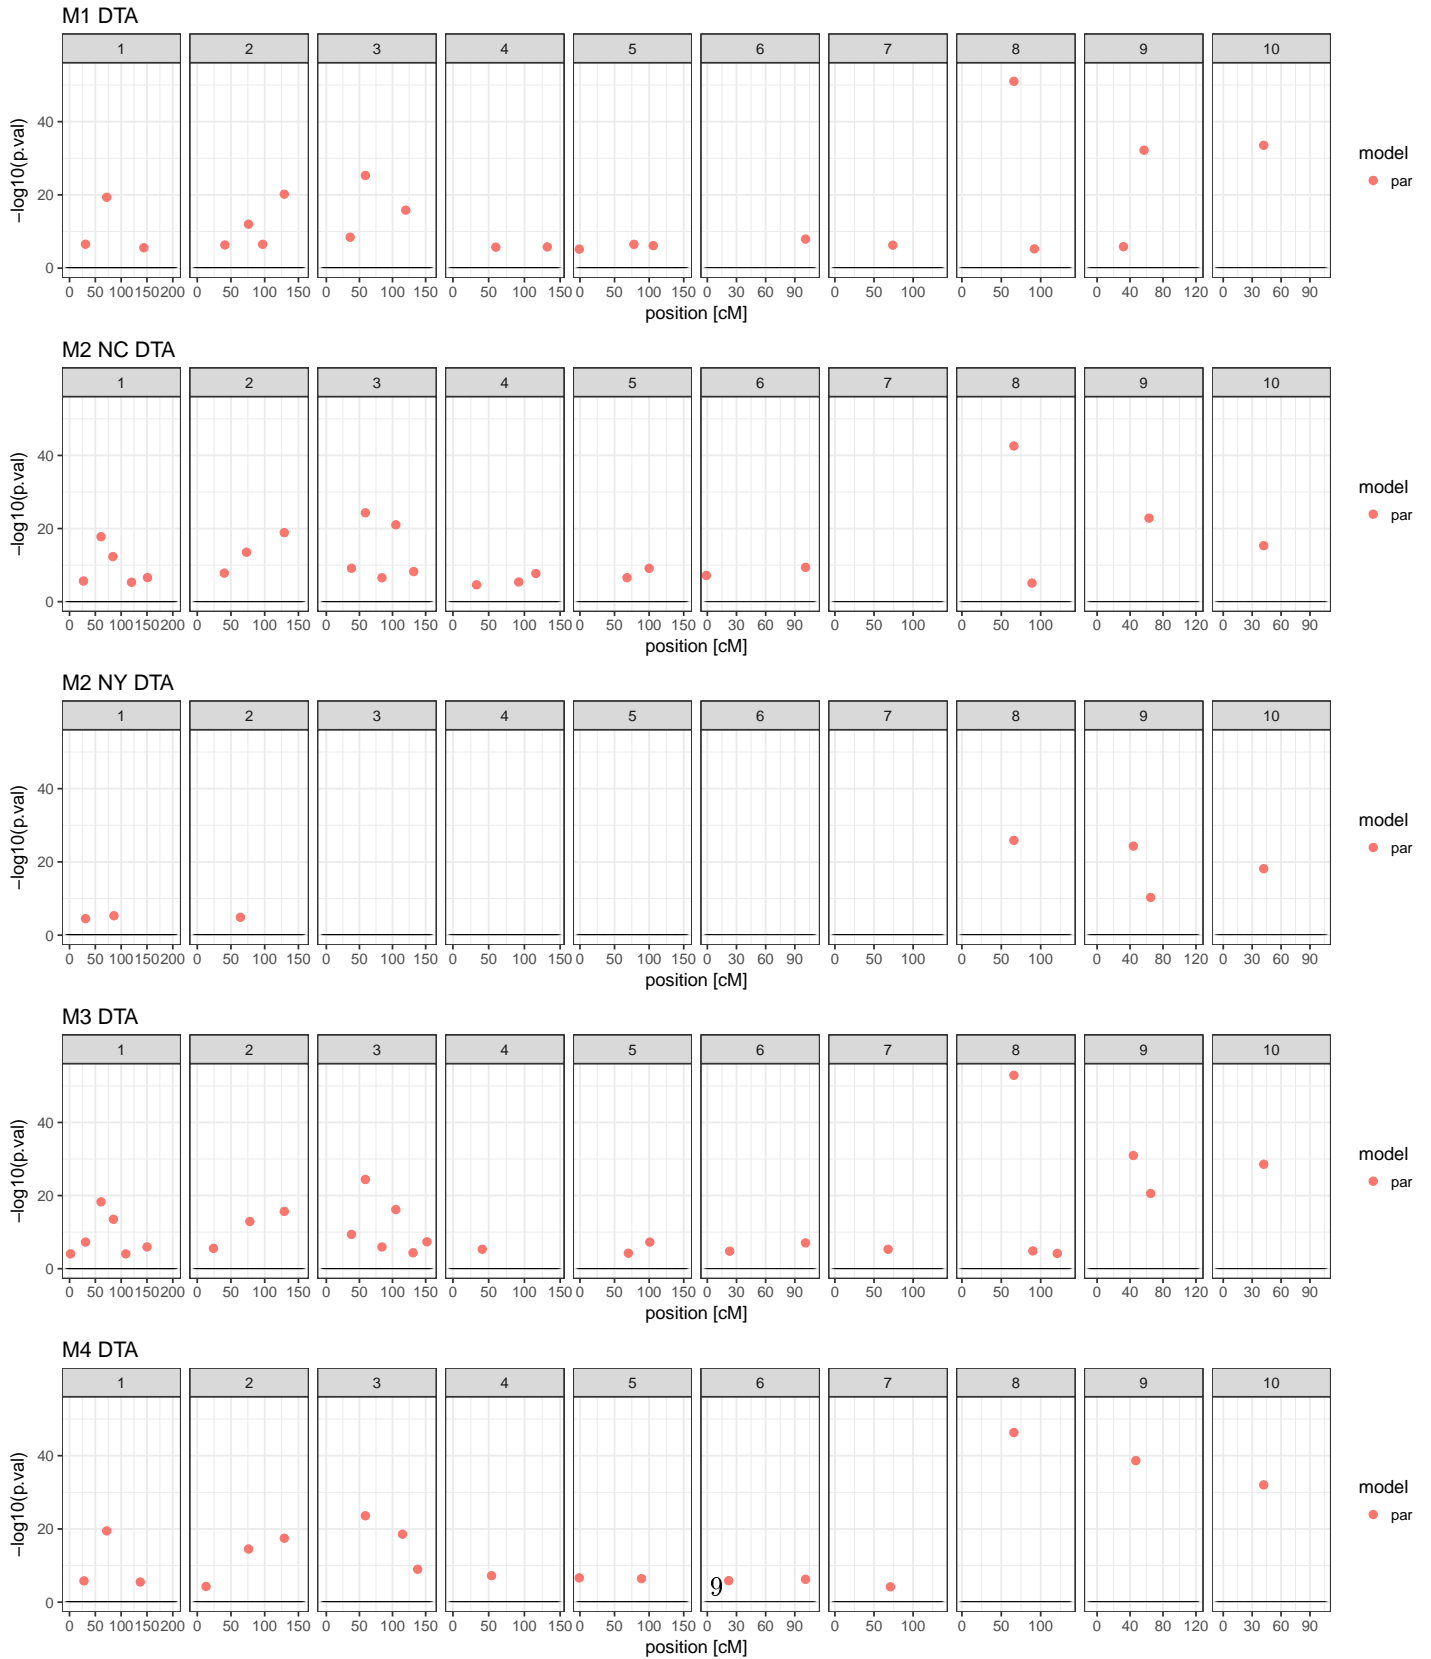

Figure 2: List of QTLs

## US-NAM M1

|          | n  | Mk. names | chr | pos [cM] | $-\log_{10}(\text{pval})$ |
|----------|----|-----------|-----|----------|---------------------------|
| parental |    |           |     |          |                           |
|          | 1  | m36       | 1   | 31       | 6.5                       |
|          | 2  | m77       | 1   | 72       | 19.4                      |
|          | 3  | m149      | 1   | 144      | 5.6                       |
|          | 4  | m255      | 2   | 41       | 6.3                       |
|          | 5  | m290      | 2   | 76       | 12                        |
|          | 6  | m311      | 2   | 97       | 6.5                       |
|          | 7  | m343      | 2   | 129      | 20.2                      |
|          | 8  | m413      | 3   | 36       | 8.5                       |
|          | 9  | m436      | 3   | 59       | 25.3                      |
|          | 10 | m497      | 3   | 120      | 15.8                      |
|          | 11 | m599      | 4   | 60       | 5.7                       |
|          | 12 | m671      | 4   | 132      | 5.8                       |
|          | 13 | m689      | 5   | -1       | 5.2                       |
|          | 14 | m768      | 5   | 78       | 6.5                       |
|          | 15 | m796      | 5   | 106      | 6.2                       |
|          | 16 | m947      | 6   | 101      | 7.9                       |
|          | 17 | m1032     | 7   | 74       | 6.3                       |
|          | 18 | m1162     | 8   | 66       | 5.1                       |
|          | 19 | m1188     | 8   | 92       | 5.3                       |
|          | 20 | m1275     | 9   | 32       | 5.9                       |
|          | 21 | m1300     | 9   | 57       | 32.2                      |
|          | 22 | m1414     | 10  | 42       | 33.5                      |

## US-NAM M2 New York

|          | n  | Mk. names | chr | pos [cM] | $-\log_{10}(\text{pval})$ |
|----------|----|-----------|-----|----------|---------------------------|
| parental |    |           |     |          |                           |
|          | 1  | m32       | 1   | 27       | 5.7                       |
|          | 2  | m66       | 1   | 61       | 17.8                      |
|          | 3  | m89       | 1   | 84       | 12.3                      |
|          | 4  | m125      | 1   | 120      | 5.3                       |
|          | 5  | m156      | 1   | 151      | 6.6                       |
|          | 6  | m254      | 2   | 40       | 7.8                       |
|          | 7  | m287      | 2   | 73       | 13.5                      |
|          | 8  | m343      | 2   | 129      | 18.9                      |
|          | 9  | m415      | 3   | 38       | 9.1                       |
|          | 10 | m436      | 3   | 59       | 24.3                      |
|          | 11 | m461      | 3   | 84       | 6.5                       |
|          | 12 | m482      | 3   | 105      | 21                        |
|          | 13 | m509      | 3   | 132      | 8.2                       |
|          | 14 | m572      | 4   | 33       | 4.6                       |
|          | 15 | m631      | 4   | 92       | 5.4                       |
|          | 16 | m655      | 4   | 116      | 7.7                       |
|          | 17 | m758      | 5   | 68       | 6.6                       |
|          | 18 | m790      | 5   | 100      | 9.1                       |
|          | 19 | m845      | 6   | -1       | 7.2                       |
|          | 20 | m947      | 6   | 101      | 9.4                       |
|          | 21 | m1162     | 8   | 66       | 42.6                      |
|          | 22 | m1185     | 8   | 89       | 5.1                       |
|          | 23 | m1306     | 9   | 63       | 22.9                      |
|          | 24 | m1414     | 10  | 42       | 15.3                      |

## US-NAM M2 North Carolina

|          | n | Mk. names | chr | pos [cM] | $-\log_{10}(\text{pval})$ |
|----------|---|-----------|-----|----------|---------------------------|
| parental |   |           |     |          |                           |
|          | 1 | m36       | 1   | 31       | 4.5                       |
|          | 2 | m91       | 1   | 86       | 5.3                       |
|          | 3 | m278      | 2   | 64       | 4.9                       |
|          | 4 | m1162     | 8   | 66       | 25.9                      |
|          | 5 | m1287     | 9   | 44       | 24.3                      |
|          | 6 | m1308     | 9   | 65       | 10.3                      |
|          | 7 | m1414     | 10  | 42       | 18.2                      |

### US-NAM M3

|          | n  | Mk. names | chr | pos [cM] | $-\log_{10}(\text{pval})$ |
|----------|----|-----------|-----|----------|---------------------------|
| parental |    |           |     |          |                           |
|          | 1  | m7        | 1   | 2        | 4.1                       |
|          | 2  | m36       | 1   | 31       | 7.3                       |
|          | 3  | m66       | 1   | 61       | 18.3                      |
|          | 4  | m90       | 1   | 85       | 13.5                      |
|          | 5  | m114      | 1   | 109      | 4.1                       |
|          | 6  | m155      | 1   | 150      | 6                         |
|          | 7  | m238      | 2   | 24       | 5.6                       |
|          | 8  | m292      | 2   | 78       | 12.9                      |
|          | 9  | m343      | 2   | 129      | 15.7                      |
|          | 10 | m415      | 3   | 38       | 9.4                       |
|          | 11 | m436      | 3   | 59       | 24.4                      |
|          | 12 | m461      | 3   | 84       | 5.9                       |
|          | 13 | m482      | 3   | 105      | 16.2                      |
|          | 14 | m508      | 3   | 131      | 4.4                       |
|          | 15 | m529      | 3   | 152      | 7.4                       |
|          | 16 | m580      | 4   | 41       | 5.3                       |
|          | 17 | m760      | 5   | 70       | 4.2                       |
|          | 18 | m791      | 5   | 101      | 7.3                       |
|          | 19 | m869      | 6   | 23       | 4.8                       |
|          | 20 | m947      | 6   | 101      | 7.1                       |
|          | 21 | m1026     | 7   | 68       | 5.3                       |
|          | 22 | m1162     | 8   | 66       | 52.9                      |
|          | 23 | m1186     | 8   | 90       | 4.9                       |
|          | 24 | m1217     | 8   | 121      | 4.2                       |
|          | 25 | m1287     | 9   | 44       | 31                        |
|          | 26 | m1308     | 9   | 65       | 20.6                      |
|          | 27 | m1414     | 10  | 42       | 28.6                      |

## US-NAM M4

|          | n  | Mk. names | chr | pos [cM] | $-\log_{10}(\text{pval})$ |
|----------|----|-----------|-----|----------|---------------------------|
| parental |    |           |     |          |                           |
|          | 1  | m33       | 1   | 28       | 5.8                       |
|          | 2  | m77       | 1   | 72       | 19.5                      |
|          | 3  | m142      | 1   | 137      | 5.5                       |
|          | 4  | m227      | 2   | 13       | 4.3                       |
|          | 5  | m290      | 2   | 76       | 14.5                      |
|          | 6  | m343      | 2   | 129      | 17.5                      |
|          | 7  | m436      | 3   | 59       | 23.6                      |
|          | 8  | m492      | 3   | 115      | 18.6                      |
|          | 9  | m515      | 3   | 138      | 9                         |
|          | 10 | m593      | 4   | 54       | 7.2                       |
|          | 11 | m689      | 5   | -1       | 6.6                       |
|          | 12 | m779      | 5   | 89       | 6.4                       |
|          | 13 | m868      | 6   | 22       | 5.9                       |
|          | 14 | m947      | 6   | 101      | 6.3                       |
|          | 15 | m1029     | 7   | 71       | 4.2                       |
|          | 16 | m1162     | 8   | 66       | 46.3                      |
|          | 17 | m1290     | 9   | 47       | 38.6                      |
|          | 18 | m1414     | 10  | 42       | 32                        |

### S3: QTL additive effects allelic series

#### EU-NAM chr 6 82.1 cM

Table 1: QTL additive effects and standard deviations

|        | $\beta_{M1}$ | $\beta_{M4-E1}$ | $\beta_{M4-E2}$ | $sd(\beta_{M1})$ | $sd(\beta_{M4-E1})$ | $sd(\beta_{M4-E2})$ | $\beta/sd(\beta)(M1)$ | $\beta/sd(\beta)(M4-E1)$ | $\beta/sd(\beta)(M4-E2)$ |
|--------|--------------|-----------------|-----------------|------------------|---------------------|---------------------|-----------------------|--------------------------|--------------------------|
| UH007  | 0.00         | 0.00            | 0.00            | 0.00             | 0.00                | 0.00                |                       |                          |                          |
| EZ5    | 0.00         | 0.00            | 0.00            | 0.00             | 0.00                | 0.00                |                       |                          |                          |
| UH009  | 0.00         | 0.00            | 0.00            | 0.00             | 0.00                | 0.00                |                       |                          |                          |
| D152   | -4.07        | -1.19           | -7.20           | 0.71             | 0.83                | 0.83                | -5.75                 | -1.42                    | -8.63                    |
| EC49A  | -4.07        | -1.19           | -7.20           | 0.71             | 0.83                | 0.83                | -5.75                 | -1.42                    | -8.63                    |
| F03802 | -4.07        | -1.19           | -7.20           | 0.71             | 0.83                | 0.83                | -5.75                 | -1.42                    | -8.63                    |
| F2     | -4.07        | -1.19           | -7.20           | 0.71             | 0.83                | 0.83                | -5.75                 | -1.42                    | -8.63                    |
| F283   | -4.07        | -1.19           | -7.20           | 0.71             | 0.83                | 0.83                | -5.75                 | -1.42                    | -8.63                    |
| UH006  | -4.07        | -1.19           | -7.20           | 0.71             | 0.83                | 0.83                | -5.75                 | -1.42                    | -8.63                    |
| DK105  | -4.07        | -1.19           | -7.20           | 0.71             | 0.83                | 0.83                | -5.75                 | -1.42                    | -8.63                    |
| F64    | -6.13        | 0.52            | -12.81          | 2.13             | 2.40                | 2.40                | -2.88                 | 0.22                     | -5.34                    |
| EP44   | -0.94        | 5.65            | 10.19           | 5.72             | 5.63                | 5.63                | -0.17                 | 1.00                     | 1.81                     |

#### US-NAM chr 8 66 cM

Table 2: QTL additive effects and standard deviations

|        | $\beta_{M1}$ | $\beta_{M4-E1}$ | $\beta_{M4-E2}$ | $sd(\beta_{M1})$ | $sd(\beta_{M4-E1})$ | $sd(\beta_{M4-E2})$ | $\beta/sd(\beta)(M1)$ | $\beta/sd(\beta)(M4-E1)$ | $\beta/sd(\beta)(M4-E2)$ |
|--------|--------------|-----------------|-----------------|------------------|---------------------|---------------------|-----------------------|--------------------------|--------------------------|
| B73    | 0.00         | 0.00            | 0.00            | 0.00             | 0.00                | 0.00                |                       |                          |                          |
| B97    | 0.04         | 0.09            | 0.08            | 0.14             | 0.14                | 0.14                | 0.27                  | 0.66                     | 0.56                     |
| CML103 | 0.29         | 0.55            | 0.21            | 0.16             | 0.16                | 0.16                | 1.83                  | 3.46                     | 1.31                     |
| CML228 | 0.36         | 0.43            | 0.45            | 0.22             | 0.22                | 0.22                | 1.61                  | 1.92                     | 2.03                     |
| CML247 | 0.54         | 0.45            | 0.55            | 0.17             | 0.20                | 0.20                | 3.12                  | 2.28                     | 2.83                     |
| CML277 | -0.05        | 0.26            | -0.17           | 0.22             | 0.18                | 0.18                | -0.20                 | 1.44                     | -0.94                    |
| CML322 | 0.41         | 0.68            | 0.60            | 0.16             | 0.18                | 0.18                | 2.62                  | 3.91                     | 3.45                     |
| CML333 | 0.60         | 0.69            | 0.62            | 0.17             | 0.19                | 0.19                | 3.55                  | 3.65                     | 3.30                     |
| CML52  | 0.59         | 0.47            | 0.52            | 0.22             | 0.19                | 0.19                | 2.65                  | 2.49                     | 2.73                     |
| CML69  | 0.61         | 0.67            | 0.64            | 0.16             | 0.16                | 0.16                | 3.70                  | 4.16                     | 3.98                     |
| Hp301  | 0.08         | 0.20            | 0.19            | 0.14             | 0.14                | 0.14                | 0.54                  | 1.43                     | 1.31                     |
| IL14H  | -1.09        | -0.82           | -1.32           | 0.14             | 0.14                | 0.14                | -7.56                 | -5.80                    | -9.35                    |
| Ki11   | -0.11        | -0.06           | -0.52           | 0.19             | 0.20                | 0.20                | -0.54                 | -0.29                    | -2.61                    |
| Ki3    | 0.17         | 0.44            | -0.07           | 0.20             | 0.29                | 0.29                | 0.86                  | 1.51                     | -0.23                    |
| Ky21   | 0.38         | 0.32            | 0.46            | 0.12             | 0.13                | 0.13                | 3.09                  | 2.43                     | 3.49                     |
| M162W  | 0.03         | -0.03           | -0.11           | 0.13             | 0.16                | 0.16                | 0.25                  | -0.17                    | -0.72                    |
| M37W   | 0.20         | 0.17            | 0.00            | 0.16             | 0.15                | 0.15                | 1.24                  | 1.14                     | 0.02                     |
| M618W  | 0.62         | 0.87            | 0.53            | 0.18             | 0.20                | 0.20                | 3.54                  | 4.32                     | 2.64                     |
| MS71   | -1.06        | -0.54           | -1.17           | 0.14             | 0.13                | 0.13                | -7.54                 | -4.13                    | -8.99                    |
| NC350  | -0.27        | 0.56            | -0.20           | 0.18             | 0.18                | 0.18                | -1.45                 | 3.11                     | -1.10                    |
| NC358  | 0.04         | 0.40            | -0.05           | 0.12             | 0.14                | 0.14                | 0.32                  | 2.81                     | -0.34                    |
| Oh43   | -0.02        | -0.07           | 0.12            | 0.13             | 0.14                | 0.14                | -0.14                 | -0.50                    | 0.81                     |
| Oh7B   | 0.15         | 0.22            | 0.20            | 0.15             | 0.16                | 0.16                | 1.01                  | 1.33                     | 1.24                     |
| P39    | -1.32        | -0.99           | -1.56           | 0.18             | 0.18                | 0.18                | -7.46                 | -5.48                    | -8.69                    |
| Tx303  | 0.48         | 0.64            | 0.44            | 0.17             | 0.20                | 0.20                | 2.87                  | 3.24                     | 2.23                     |
| Tzi8   | -0.11        | -0.23           | -0.44           | 0.15             | 0.20                | 0.20                | -0.74                 | -1.17                    | -2.18                    |

## US-NAM chr 9 47 cM

Table 3: QTL additive effects and standard deviations

|        | $\beta_{M1}$ | $\beta_{M4-E1}$ | $\beta_{M4-E2}$ | $sd(\beta_{M1})$ | $sd(\beta_{M4-E1})$ | $sd(\beta_{M4-E2})$ | $\beta/sd(\beta)(M1)$ | $\beta/sd(\beta)(M4-E1)$ | $\beta/sd(\beta)(M4-E2)$ |
|--------|--------------|-----------------|-----------------|------------------|---------------------|---------------------|-----------------------|--------------------------|--------------------------|
| B73    | 0.00         | 0.00            | 0.00            | 0.00             | 0.00                | 0.00                |                       |                          |                          |
| B97    | -0.05        | 0.01            | 0.02            | 0.12             | 0.13                | 0.13                | -0.40                 | 0.06                     | 0.18                     |
| CML103 | 0.47         | 0.25            | 0.69            | 0.13             | 0.16                | 0.16                | 3.62                  | 1.57                     | 4.44                     |
| CML228 | 0.93         | 0.67            | 1.20            | 0.22             | 0.23                | 0.23                | 4.26                  | 2.95                     | 5.30                     |
| CML247 | 0.20         | -0.29           | 0.71            | 0.16             | 0.19                | 0.19                | 1.25                  | -1.52                    | 3.70                     |
| CML277 | 1.43         | 0.78            | 1.94            | 0.21             | 0.18                | 0.18                | 6.85                  | 4.41                     | 11.00                    |
| CML322 | 0.53         | 0.30            | 0.79            | 0.14             | 0.17                | 0.17                | 3.73                  | 1.79                     | 4.65                     |
| CML333 | 0.70         | 0.26            | 1.08            | 0.16             | 0.19                | 0.19                | 4.39                  | 1.39                     | 5.71                     |
| CML52  | 0.48         | 0.28            | 0.82            | 0.21             | 0.18                | 0.18                | 2.30                  | 1.55                     | 4.62                     |
| CML69  | 0.03         | -0.36           | 0.18            | 0.14             | 0.15                | 0.15                | 0.19                  | -2.42                    | 1.23                     |
| Hp301  | 0.46         | 0.51            | 0.41            | 0.13             | 0.14                | 0.14                | 3.42                  | 3.56                     | 2.81                     |
| IL14H  | -0.05        | 0.15            | 0.18            | 0.14             | 0.14                | 0.14                | -0.37                 | 1.07                     | 1.30                     |
| Ki11   | 1.10         | 0.28            | 1.85            | 0.20             | 0.21                | 0.21                | 5.43                  | 1.33                     | 8.70                     |
| Ki3    | 0.12         | -0.19           | 0.20            | 0.18             | 0.27                | 0.27                | 0.65                  | -0.69                    | 0.76                     |
| Ky21   | 0.23         | 0.29            | 0.18            | 0.10             | 0.13                | 0.13                | 2.23                  | 2.20                     | 1.35                     |
| M162W  | 0.36         | -0.11           | 0.65            | 0.14             | 0.18                | 0.18                | 2.56                  | -0.62                    | 3.66                     |
| M37W   | -0.04        | -0.02           | 0.15            | 0.15             | 0.16                | 0.16                | -0.24                 | -0.13                    | 0.96                     |
| M618W  | 0.16         | -0.36           | 0.60            | 0.17             | 0.21                | 0.21                | 0.93                  | -1.72                    | 2.82                     |
| MS71   | 0.31         | 0.04            | 0.46            | 0.13             | 0.13                | 0.13                | 2.42                  | 0.32                     | 3.58                     |
| NC350  | -0.48        | -0.57           | -0.09           | 0.15             | 0.18                | 0.18                | -3.28                 | -3.17                    | -0.51                    |
| NC358  | -0.07        | -0.29           | 0.36            | 0.12             | 0.15                | 0.15                | -0.54                 | -2.01                    | 2.47                     |
| Oh43   | 0.14         | 0.06            | 0.22            | 0.13             | 0.14                | 0.14                | 1.07                  | 0.45                     | 1.51                     |
| Oh7B   | 0.28         | 0.38            | 0.36            | 0.14             | 0.17                | 0.17                | 2.03                  | 2.20                     | 2.08                     |
| P39    | 0.28         | 0.55            | 0.50            | 0.17             | 0.19                | 0.19                | 1.62                  | 2.85                     | 2.57                     |
| Tx303  | 0.21         | -0.09           | 0.51            | 0.15             | 0.20                | 0.20                | 1.42                  | -0.42                    | 2.52                     |
| Tzi8   | 0.72         | 0.45            | 0.92            | 0.13             | 0.18                | 0.18                | 5.42                  | 2.45                     | 5.02                     |

## US-NAM chr 10 42 cM

Table 4: QTL additive effects and standard deviations

|        | $\beta_{M1}$ | $\beta_{M4-E1}$ | $\beta_{M4-E2}$ | $sd(\beta_{M1})$ | $sd(\beta_{M4-E1})$ | $sd(\beta_{M4-E2})$ | $\beta/sd(\beta)(M1)$ | $\beta/sd(\beta)(M4-E1)$ | $\beta/sd(\beta)(M4-E2)$ |
|--------|--------------|-----------------|-----------------|------------------|---------------------|---------------------|-----------------------|--------------------------|--------------------------|
| B73    | 0.00         | 0.00            | 0.00            | 0.00             | 0.00                | 0.00                |                       |                          |                          |
| B97    | -0.05        | 0.04            | -0.20           | 0.13             | 0.13                | 0.13                | -0.42                 | 0.30                     | -1.49                    |
| CML103 | -0.21        | -0.20           | -0.36           | 0.13             | 0.16                | 0.16                | -1.61                 | -1.21                    | -2.21                    |
| CML228 | 1.34         | 0.66            | 2.10            | 0.21             | 0.22                | 0.22                | 6.27                  | 2.98                     | 9.41                     |
| CML247 | -0.14        | 0.01            | -0.47           | 0.16             | 0.19                | 0.19                | -0.87                 | 0.07                     | -2.43                    |
| CML277 | 2.03         | 1.39            | 2.99            | 0.22             | 0.18                | 0.18                | 9.22                  | 7.54                     | 16.26                    |
| CML322 | -0.45        | -0.26           | -0.50           | 0.14             | 0.17                | 0.17                | -3.22                 | -1.57                    | -2.97                    |
| CML333 | 0.16         | -0.12           | 0.14            | 0.16             | 0.19                | 0.19                | 1.02                  | -0.66                    | 0.74                     |
| CML52  | 0.29         | 0.41            | 0.22            | 0.20             | 0.19                | 0.19                | 1.45                  | 2.20                     | 1.21                     |
| CML69  | -0.12        | 0.16            | -0.26           | 0.14             | 0.16                | 0.16                | -0.85                 | 1.04                     | -1.63                    |
| Hp301  | 0.20         | -0.01           | 0.41            | 0.14             | 0.15                | 0.15                | 1.44                  | -0.04                    | 2.79                     |
| IL14H  | -0.05        | 0.50            | -0.02           | 0.13             | 0.14                | 0.14                | -0.37                 | 3.62                     | -0.15                    |
| Ki11   | 1.48         | 1.09            | 1.76            | 0.19             | 0.20                | 0.20                | 7.65                  | 5.37                     | 8.69                     |
| Ki3    | -0.43        | -0.55           | -0.44           | 0.18             | 0.28                | 0.28                | -2.38                 | -1.97                    | -1.57                    |
| Ky21   | 0.23         | 0.24            | 0.33            | 0.10             | 0.13                | 0.13                | 2.22                  | 1.76                     | 2.44                     |
| M162W  | -0.08        | -0.03           | -0.37           | 0.14             | 0.18                | 0.18                | -0.61                 | -0.20                    | -2.12                    |
| M37W   | -0.17        | -0.17           | -0.23           | 0.14             | 0.15                | 0.15                | -1.22                 | -1.13                    | -1.56                    |
| M618W  | -0.21        | -0.14           | -0.42           | 0.17             | 0.21                | 0.21                | -1.23                 | -0.65                    | -1.98                    |
| MS71   | 0.17         | 0.04            | 0.26            | 0.14             | 0.14                | 0.14                | 1.21                  | 0.31                     | 1.86                     |
| NC350  | -0.20        | -0.02           | -0.07           | 0.15             | 0.18                | 0.18                | -1.31                 | -0.13                    | -0.43                    |
| NC358  | 0.22         | 0.27            | 0.26            | 0.12             | 0.14                | 0.14                | 1.87                  | 1.90                     | 1.81                     |
| Oh43   | -0.12        | -0.05           | -0.15           | 0.13             | 0.15                | 0.15                | -0.91                 | -0.33                    | -1.01                    |
| Oh7B   | -0.01        | 0.18            | 0.09            | 0.13             | 0.16                | 0.16                | -0.07                 | 1.11                     | 0.53                     |
| P39    | -0.15        | 0.00            | -0.16           | 0.16             | 0.18                | 0.18                | -0.90                 | 0.02                     | -0.89                    |
| Tx303  | -0.17        | -0.04           | -0.15           | 0.14             | 0.20                | 0.20                | -1.19                 | -0.20                    | -0.75                    |
| Tzi8   | -0.03        | -0.08           | -0.35           | 0.14             | 0.19                | 0.19                | -0.23                 | -0.40                    | -1.82                    |

## S4: QTL additive effects allelic series

Comparison of the additive effect allelic series between M1, M2, M3 and M4 and two environments for two individual QTL positions. The upper panel contain the first environment result and the lower the one from the second environment.

### EU-NAM ancestral model chr 6 82.1 cM

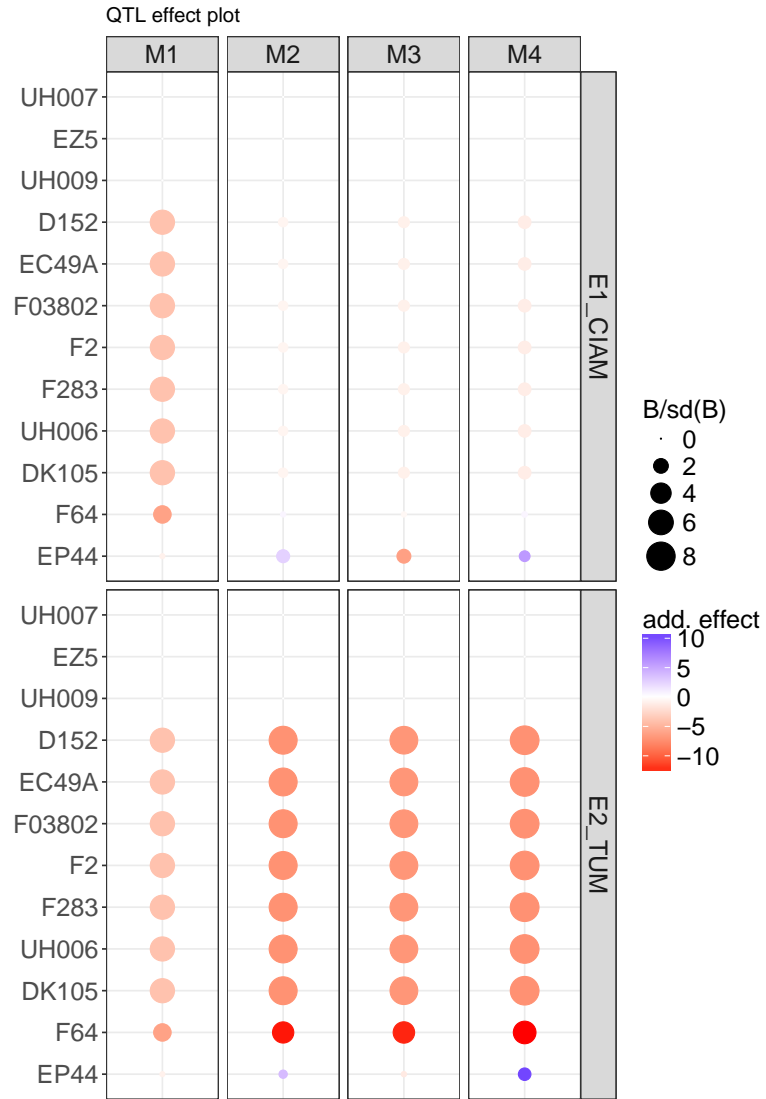

Figure 3: Comparison of the additive effect allelic series between M1, M2, M3 and M4 and two environments



# US-NAM parental model chr 8 67 cM

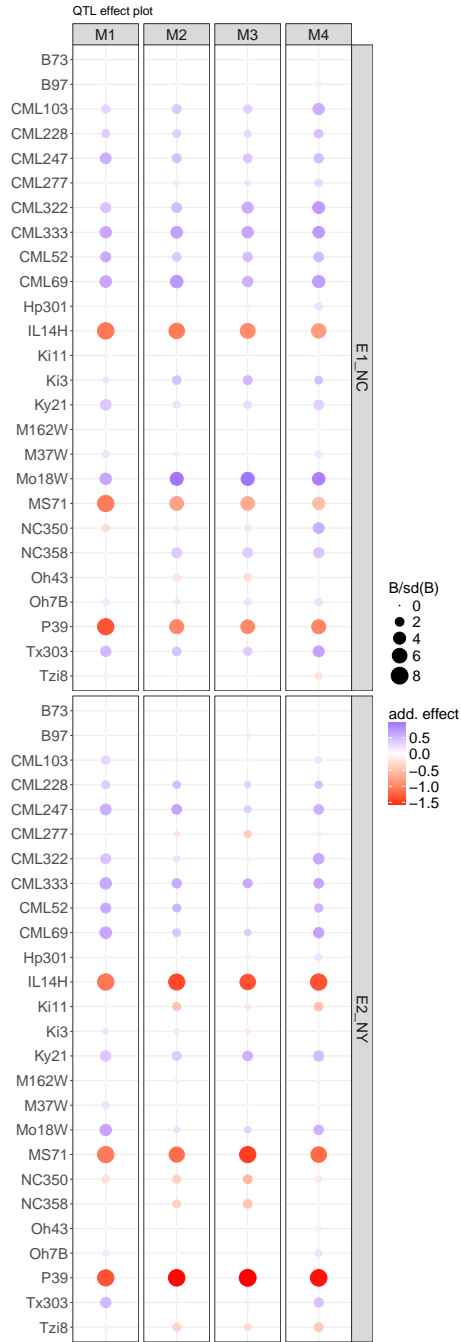

Figure 4: Comparison of the additive effect allelic series between M1, M2, M3 and M4 and two environments

## References

- Gilmour, A. R., Cullis, B. R., and Verbyla, A. P. (1997). Accounting for natural and extraneous variation in the analysis of field experiments. *Journal of Agricultural, Biological, and Environmental Statistics*, pages 269–293.
- Hung, H., Browne, C., Guill, K., Coles, N., Eller, M., Garcia, A., Lepak, N., Melia-Hancock, S., Oropeza-Rosas, M., Salvo, S., et al. (2012). The relationship between parental genetic or phenotypic divergence and progeny variation in the maize nested association mapping population. *Heredity*, 108(5):490–499.
